# Supplementary material for: Exploration of Elite Stilbene Synthase Alleles for Resveratrol Concentration in Wild Chinese Vitis spp. and Vitis Cultivars
Source: PubMed Central journal article supplement (PMC5383651; doi:10.3389/fpls.2017.00487), 2017-04-07
Supplement: Table_1.pdf [file Table_1.pdf]

Supplementary Table S1 Climate data in Zhengzhou (the National Grape Germplasm Resources Repository) in 2013 and 2014

| Year                     |           | 2013 | 2014  |
|--------------------------|-----------|------|-------|
| Mean temperature<br>(°C) | June      | 26.2 | 26.3  |
|                          | July      | 29.1 | 28.8  |
|                          | August    | 30.1 | 25.8  |
|                          | September | 23.5 | 21.2  |
| Relative humidity<br>(%) | June      | 53   | 56    |
|                          | July      | 66   | 61    |
|                          | August    | 54   | 69    |
|                          | September | 55   | 79    |
| Rainfall<br>(mm)         | June      | 20.2 | 27.9  |
|                          | July      | 45.1 | 50.3  |
|                          | August    | 63.9 | 67.7  |
|                          | September | 9.8  | 228.0 |

Notes: The data were from the National Grape Germplasm Resources Repository of Zhengzhou Fruit Research Institute,

Supplementary Table S2 The variation of resveratrol content in four environments. ND means not detected using HPLC method.

A. The variation of resveratrol content of 95 accessions.

| Variation      | In skins |         | In leaves |         |
|----------------|----------|---------|-----------|---------|
|                | Number   | Percent | Number    | Percent |
| ≥100%          | 5        | 5.26%   | 14        | 14.74%  |
| <100% and ≥50% | 22       | 23.16%  | 27        | 28.42%  |
| <50% and ≥20%  | 15       | 15.79%  | 12        | 12.63%  |
| <20% and ≥10%  | 13       | 13.68%  | 18        | 18.95%  |
| <10%           | 37       | 38.95%  | 15        | 15.79%  |
| ND             | 3        | 3.16%   | 9         | 9.47%   |

Notes: Variation =  $|\text{Resveratrol amount in 2014} - \text{Resveratrol amount in 2013}| / \text{Resveratrol amount in 2013} * 100\%$ .

Percent = the Number/95\*100%.

B. The variation of resveratrol content of 45 cultivars.

| Variation      | In skins |         | In leaves |         |
|----------------|----------|---------|-----------|---------|
|                | Number   | Percent | Number    | Percent |
| ≥100%          | 4        | 8.89%   | 4         | 8.89%   |
| <100% and ≥50% | 19       | 42.22%  | 26        | 57.78%  |
| <50% and ≥20%  | 5        | 11.11%  | 6         | 13.33%  |
| <20% and ≥10%  | 5        | 11.11%  | 5         | 11.11%  |
| <10%           | 9        | 20.00%  | 2         | 4.44%   |
| ND             | 3        | 6.67%   | 2         | 4.44%   |

Notes: Variation =  $|\text{Resveratrol amount in 2014} - \text{Resveratrol amount in 2013}| / \text{Resveratrol amount in 2013} * 100\%$ .

Percent = the Number/45\*100%.

C. The variation of resveratrol content of 50 wild accessions.

| Variation      | In skins |         | In leaves |         |
|----------------|----------|---------|-----------|---------|
|                | Number   | Percent | Number    | Percent |
| ≥100%          | 1        | 2.00%   | 10        | 20.00%  |
| <100% and ≥50% | 3        | 6.00%   | 1         | 2.00%   |
| <50% and ≥20%  | 10       | 20.00%  | 6         | 12.00%  |
| <20% and ≥10%  | 8        | 16.00%  | 13        | 26.00%  |
| <10%           | 28       | 56.00%  | 13        | 26.00%  |
| ND             | 0        | 0.00%   | 7         | 14.00%  |

Notes: Variation =  $|\text{Resveratrol amount in 2014} - \text{Resveratrol amount in 2013}| / \text{Resveratrol amount in 2013} * 100\%$ .

Percent = the Number/50\*100%.

Supplementary Table S3 The sequence and genetic characterization of 40 SSR markers from the grapevine PN40024 genotype.

Abbreviations: the number of alleles (Na), effective number of alleles (Ne), observed heterozygosity (Ho), and expected heterozygosity (He), and polymorphism information content (PIC).

| Primer Name | Forward primer (5'-3') | Reverse primer (5'-3') | Expected product (bp) | Na     | Ne     | Ho     | He     | PIC    |
|-------------|------------------------|------------------------|-----------------------|--------|--------|--------|--------|--------|
| Sh1         | TATAAGCAATGGGTAA       | TATTTGATAGGGATG        | 282                   | 4.0000 | 1.5842 | 0.0108 | 0.3708 | 0.3213 |
| Sh2         | ACTTATCCTTTAGGGTTA     | CTAAATACAATTGGAAA      | 275                   | 3.0000 | 1.1483 | 0.0947 | 0.1298 | 0.1239 |
| Sh3         | AACCCATACATACCCTT      | CTAACTTAGATATCCCAGA    | 239                   | 4.0000 | 1.6288 | 0.0737 | 0.3881 | 0.3581 |
| Sh4         | GGCTACATTAAGTAACCT     | GGATATGGAATAACAAG      | 245                   | 2.0000 | 1.7115 | 0.1474 | 0.4179 | 0.3293 |
| Sh5         | GATCTAATTTACGGTCAC     | TTAGAAGAATATGGTGGA     | 236                   | 4.0000 | 1.1896 | 0.0638 | 0.1603 | 0.1534 |
| Sh6         | CAAAGTAGAAGAGTGCAACA   | CCAAGTCCATAAACCTC      | 219                   | 6.0000 | 1.9507 | 0.2211 | 0.4899 | 0.4648 |
| Sh9         | TTCAAAGTTTCAAGCATC     | TTCCCTGGGCCTTCTAT      | 243                   | 5.0000 | 3.1577 | 0.3407 | 0.6871 | 0.6447 |
| Sh13        | AATTGAGATAACGCCTAG     | TCTCCCTGATAATAGTG      | 213                   | 3.0000 | 1.1005 | 0.0947 | 0.0918 | 0.0894 |
| Sh15        | AGGTGTGCCTGATTGTG      | TTTtaggtcgcttagatg     | 276                   | 3.0000 | 1.2858 | 0.2500 | 0.2235 | 0.2038 |
| Sh16        | TTTGGTGGCTCAAGTTA      | ATTGAACAAGTCATAGTTGTCT | 228                   | 3.0000 | 1.8921 | 0.7097 | 0.4740 | 0.3701 |
| Sh17        | ATTGCCCATGTTAGTAA      | ATCCTCAITGATTTTAGC     | 172                   | 4.0000 | 2.2220 | 0.0323 | 0.5529 | 0.4750 |
| Sh18        | AATACTCAGTTTAAAG       | TACGAAATGAGTCTAA       | 126                   | 2.0000 | 1.7317 | 0.0319 | 0.4248 | 0.3330 |
| Sh20        | TAGAAAACGACAAAAC       | GTTCACATAGGTCCAC       | 205                   | 4.0000 | 3.1564 | 0.3333 | 0.6876 | 0.6257 |
| Sh21        | ACTAACTAGAAAGTGCT      | TAAACTATGTGAGGAGAA     | 264                   | 4.0000 | 1.1990 | 0.0737 | 0.1669 | 0.1578 |
| Sh22        | CATGGACTGTGATTTGTT     | TAGCATCTCAAGCTCAAC     | 240                   | 2.0000 | 1.2800 | 0.2167 | 0.2206 | 0.1948 |
| Sh24        | CATACATCACATAACCCCT    | TTGAAGCATTGGATTACT     | 247                   | 2.0000 | 1.1824 | 0.1053 | 0.1551 | 0.1423 |
| Sh28        | TCTCAATAAACCAACTCT     | ACGTGGCTCTTATAATAC     | 220                   | 3.0000 | 1.3024 | 0.2632 | 0.2334 | 0.2116 |
| Sh29        | TTTAGACAACCCATTAGA     | TTAACGCAAGCTAAGTAT     | 212                   | 2.0000 | 1.5654 | 0.3226 | 0.3632 | 0.2960 |
| Sh30        | CATACCTGGATAGCGAACA    | GACCCCTGTGCATGTTT      | 263                   | 2.0000 | 1.3489 | 0.3053 | 0.2600 | 0.2252 |
| Sh31        | ATATTACAATACCAAAGCC    | TAGGAGAAGTCCCTAAA      | 186                   | 3.0000 | 1.1350 | 0.1263 | 0.1196 | 0.1131 |
| Sh32        | TGAGAAGTCCAGAACTA      | GACTTCTTGAAAATGGTT     | 222                   | 5.0000 | 3.5732 | 0.1183 | 0.7240 | 0.6712 |
| Sh34        | GGAGGTCTACATCGTGA      | AACCTTACACTTGGCACA     | 253                   | 3.0000 | 2.0849 | 0.5532 | 0.5232 | 0.4514 |
| Sh37        | CAATTTAAGAGCTACAC      | AAATGAGTCTAATCCAA      | 153                   | 2.0000 | 1.8705 | 0.6737 | 0.4678 | 0.3571 |
| Sh42        | ATGCAACAGATAAACCTC     | CTTCGAAAACATAAAACA     | 226                   | 3.0000 | 2.0703 | 0.0638 | 0.5197 | 0.4036 |
| Sh43        | TTTAGAAATGTGGCATAGAG   | CCTTGAGGATAGGGAGAA     | 221                   | 2.0000 | 1.9919 | 0.2340 | 0.5006 | 0.3740 |
| Sh44        | TGTAAGATCCATCTGAG      | GTGCTGATAATGTAATGTA    | 248                   | 5.0000 | 3.1169 | 0.5000 | 0.6831 | 0.6407 |
| Sh48        | AAATGGGTCCCAATGAAG     | CAAGATGGGTGATAGTAAAT   | 211                   | 2.0000 | 1.0213 | 0.0211 | 0.0209 | 0.0206 |
| Sh49        | AAAGTTATGCAAGCTCTG     | GTCCTAATCCAACCTCAG     | 177                   | 3.0000 | 1.2516 | 0.2211 | 0.2021 | 0.1887 |
| Sh53        | CCCACCTGAATCCACTCATTT  | ACCTCCTCAAAGACCTCAAGTT | 158                   | 3.0000 | 1.1835 | 0.1684 | 0.1559 | 0.1446 |
| Sh56        | AGACACCTACTCAATCCATTGC | ATCATTTCCATACAGGTCCTT  | 125                   | 3.0000 | 1.1591 | 0.1474 | 0.1380 | 0.1292 |
| Sh59        | CCTTCCATTATCCAACATTCTC | GAGGGTAGGAGGTCTAATTC   | 128                   | 3.0000 | 1.2985 | 0.2632 | 0.2311 | 0.2058 |
| Sh61        | GGAACCTGGAGTCTCATCCTT  | GGCTTGACCATTGAACTGTTG  | 254                   | 2.0000 | 1.4297 | 0.3684 | 0.3021 | 0.2554 |
| Sh63        | CCAGACAAGAGAATGAGCAGAG | GGTATCCCGCAACAATGTAGAA | 124                   | 4.0000 | 1.7948 | 0.2421 | 0.4452 | 0.4034 |
| Sh64        | CCGACGGTGTCTACGATAGA   | GTGATCTTGGACGCCTGAATT  | 217                   | 2.0000 | 1.0651 | 0.0632 | 0.0615 | 0.0593 |
| Sh68        | ACCATCGTTGTTCTGTAATAAG | AGCAGAATGGAGAATCAGTGT  | 163                   | 2.0000 | 1.0430 | 0.0000 | 0.0414 | 0.0405 |
| Sh73        | TGAGGTCACTACACCTTCTAAC | GGACCAGGCTTAACCATTGAA  | 233                   | 4.0000 | 2.5024 | 0.9158 | 0.6036 | 0.5195 |
| Sh75        | CTTCTCATCTCATCCATT     | GAGTTCTCAGGTGCCAAA     | 271                   | 3.0000 | 1.5146 | 0.0842 | 0.3416 | 0.3137 |
| Sh76        | CTCTTCTCTCCACTCT       | GCCCACCTTGTTTGAAT      | 113                   | 3.0000 | 2.1421 | 0.0952 | 0.5364 | 0.4242 |

|      |                      |                      |              |        |        |        |        |        |
|------|----------------------|----------------------|--------------|--------|--------|--------|--------|--------|
| Sh77 | TTGAACCAGATGAGAAACCA | CGACCGATTGAGGCTTAA   | 117          | 2.0000 | 1.0321 | 0.0105 | 0.0312 | 0.0306 |
| Sh78 | TGGATGATGTATGTCTCACA | GGTAACACAATGTTTGCTCT | 159          | 2.0000 | 1.0430 | 0.0421 | 0.0414 | 0.0405 |
|      |                      |                      | <b>Total</b> | 123    |        |        | Mean   | 0.2877 |

---
